# Supplementary material
Source: publisher site journal article supplement (https://www.spandidos-publications.com/2501/downloadSupplementary)
Supplement: Supplementary file 1 [file downloadSupplementary]

## Sheet: Sheet1
Table SIII. A total of 98 DElncRNAs and 1,411 DEmRNAs were predicted to interact with 16 DEmiRNAs.
miRNA	lncRNA	mRNA
hsa-let-7b-5p	AC006329.1	A1CF
hsa-let-7c-5p	AC006333.2	ABCA3
hsa-let-7f-5p	AC008443.1	ABCA5
hsa-let-7g-5p	AC008741.2	ABCB1
hsa-miR-101-3p	AC010719.1	ABCB6
hsa-miR-106b-5p	AC012360.3	ABCC1
hsa-miR-107	AC015922.4	ABCD3
hsa-miR-10a-5p	AC016027.1	ABCG2
hsa-miR-10b-5p	AC016727.1	ABHD3
hsa-miR-125a-5p	AC016888.1	ABI3BP
hsa-miR-125b-5p	AC020916.1	ABLIM3
hsa-miR-126-3p	AC024060.1	ACAA2
hsa-miR-126-5p	AC073335.2	ACACB
hsa-miR-1271-5p	AC087388.1	ACADM
hsa-miR-129-5p	AC087741.1	ACADS
hsa-miR-1-3p	AC092171.3	ACAN
	AC104083.1	ACAT1
	AC104958.2	ACHE
	AC120114.2	ACTG2
	AC232271.1	ACTL10
	AC245140.2	ACTR3B
	AL022311.1	ACVR1C
	AL031985.3	ACVRL1
	AL121832.3	ADAM28
	AL161431.1	ADAM33
	AL161772.1	ADAMTS1
	AL161891.1	ADAMTS12
	AL353796.1	ADAMTS6
	AL391056.1	ADAMTS8
	AL391244.3	ADAMTSL3
	AL590617.2	ADAT2
	AL662844.4	ADCY3
	AL691432.2	ADCY9
	AP002761.4	ADGRD1
	ARHGAP27P1-BPTFP1-KPNA2P3	ADGRG1
	BBOX1-AS1	ADGRG6
	BLACAT1	ADGRL2
	BX890604.1	ADGRL3
	C5orf66	ADGRV1
	CAPN10-AS1	AEN
	CDKN2B-AS1	AFF1
	CRNDE	AGAP3
	CYTOR	AGL
	DRAIC	AGT
	FENDRR	AHCY
	FEZF1-AS1	AHCYL2
	GAS5	AHNAK
	HAGLR	AHNAK2
	KCNQ1OT1	AHRR
	LINC00174	AIF1L
	LINC00265	AJUBA
	LINC00294	AKAP12
	LINC00346	AKAP5
	LINC00641	AKAP6
	LINC00858	AKR1B10
	LINC01133	AKT3
	LINC01232	ALDH6A1
	LINC01569	ALG3
	LINC01588	ALPI
	LINC01605	AMER1
	LINC01748	AMOTL1
	LINC01978	AMPD2
	LINC01979	ANGPT1
	LINC02418	ANK2
	MAFG-AS1	ANK3
	MAGI2-AS3	ANKRD12
	MBNL1-AS1	ANKRD13B
	MELTF-AS1	ANKRD33B
	MIR100HG	ANKRD44
	MIR17HG	ANKS6
	MIR22HG	ANLN
	MIR3142HG	ANO5
	MIR4435-2HG	ANPEP
	MMP25-AS1	ANTXR2
	PCAT6	APBA1
	PDCD4-AS1	APBB1
	PTOV1-AS2	APBB1IP
	PVT1	APC
	RHPN1-AS1	APLN
	RNF139-AS1	APMAP
	RUSC1-AS1	APOBEC3C
	SLC16A1-AS1	APPL2
	SLC9A3-AS1	AQP11
	SMIM25	ARFGAP1
	SNHG1	ARG2
	SNHG11	ARHGAP24
	SNHG12	ARHGAP28
	SNHG15	ARHGAP30
	SNHG17	ARHGAP39
	SNHG20	ARHGAP42
	SNHG4	ARHGAP44
	SNHG6	ARHGEF18
	STAG3L5P-PVRIG2P-PILRB	ARHGEF26
	TMEM147-AS1	ARHGEF37
	TRPM2-AS	ARHGEF6
	VPS9D1-AS1	ARID3A
	ZFAS1	ARL4D
	ZNF710-AS1	ARMC10
		ARMC2
		ARMCX1
		ARNT2
		ARNTL2
		ARRB1
		ARRDC1
		ARRDC4
		ASAP3
		ASGR1
		ASIC1
		ASPHD1
		ATAD2
		ATAT1
		ATIC
		ATL1
		ATP11A
		ATP2A3
		ATP2B1
		ATP2B4
		ATP6V1E2
		ATP6V1F
		ATP8A1
		ATP8B1
		AUNIP
		AURKA
		AXIN2
		B3GNT5
		B3GNT7
		BACE2
		BAG2
		BARX2
		BBC3
		BCAR3
		BCAS1
		BCL10
		BCL2
		BCL2L1
		BCL2L2
		BDKRB2
		BGN
		BHLHE41
		BICDL1
		BIN2
		BIRC3
		BMP2
		BMP5
		BMP6
		BNC2
		BRCA2
		BTC
		BVES
		BYSL
		C16orf45
		C18orf32
		C19orf48
		C1orf109
		C1orf115
		C1orf21
		C1orf210
		C2
		C20orf194
		C20orf24
		C2CD4A
		C2orf15
		C2orf72
		C2orf88
		C3orf70
		C4orf19
		C5orf30
		C6orf223
		CA12
		CA2
		CACNA2D1
		CACNB2
		CAD
		CADM1
		CALB2
		CALD1
		CALM1
		CAMK2D
		CAMK2N1
		CAMK4
		CAND2
		CAP2
		CAPN2
		CAPN5
		CASD1
		CASP5
		CASP7
		CASZ1
		CAV1
		CAVIN1
		CAVIN2
		CBFA2T3
		CBFB
		CBWD6
		CBX2
		CBX4
		CBX6
		CBX7
		CBX8
		CCDC113
		CCDC150
		CCDC152
		CCDC68
		CCDC86
		CCDC88A
		CCND1
		CCNE1
		CCNG2
		CCNJL
		CCNL2
		CCNO
		CCNYL1
		CCR7
		CD302
		CD37
		CD3EAP
		CD44
		CD48
		CD69
		CD79A
		CDA
		CDC14A
		CDC25B
		CDC6
		CDCA3
		CDCA4
		CDCA7
		CDH3
		CDIP1
		CDK4
		CDKN1A
		CDKN2B
		CDON
		CEACAM1
		CEACAM6
		CEBPB
		CELSR1
		CELSR3
		CEMIP
		CEP250
		CEP85L
		CES2
		CFB
		CFD
		CFL2
		CGREF1
		CGRRF1
		CHAC1
		CHAF1B
		CHCHD6
		CHD7
		CHI3L1
		CHL1
		CHMP4C
		CHP1
		CIPC
		CITED2
		CKAP2
		CKB
		CKMT1B
		CKS2
		CLDN1
		CLDN5
		CLEC2B
		CLIC4
		CLIC5
		CLIP4
		CLU
		CMBL
		CMKLR1
		CMTM7
		CNN1
		CNNM2
		CNNM4
		CNRIP1
		COL10A1
		COL11A1
		COL14A1
		COL1A1
		COL27A1
		COL4A4
		COL4A5
		COLEC12
		COMT
		CP
		CPEB2
		CPEB3
		CPEB4
		CPED1
		CPM
		CPNE1
		CPNE8
		CPSF1
		CPT2
		CPXM2
		CRYBG3
		CSE1L
		CSF1
		CSRP1
		CTHRC1
		CTSS
		CXCL12
		CXCL3
		CXCL8
		CYBRD1
		CYP2S1
		CYYR1
		DAAM2
		DACH1
		DAPK1
		DBF4B
		DBNDD1
		DCLK1
		DCLK2
		DCN
		DDIAS
		DDIT4
		DDN
		DDR2
		DDX11
		DDX27
		DDX31
		DDX55
		DENND5B
		DGAT2
		DHCR7
		DHDDS
		DHRS11
		DHX34
		DIAPH3
		DIP2C
		DIRC2
		DISP2
		DIXDC1
		DKC1
		DMD
		DMPK
		DMXL1
		DNAH14
		DNAJB4
		DNAJB5
		DNAJC2
		DNMT3B
		DOCK10
		DOCK6
		DPYD
		DSC2
		DSCC1
		DSEL
		DSN1
		DST
		DTNA
		DTNB
		DTX2
		DUS1L
		DUS4L
		DUSP14
		DUSP2
		DZIP1
		E2F1
		E2F2
		E2F5
		E2F7
		EBF1
		EBPL
		ECI2
		ECT2
		EDIL3
		EDNRB
		EFEMP1
		EFNA5
		EGLN3
		EHD2
		EIF2S2
		EIF4E3
		EIF4EBP1
		ELMSAN1
		ELOVL6
		EMCN
		EME1
		EML1
		EMP1
		EMP3
		ENC1
		ENDOD1
		ENGASE
		ENPP2
		ENTPD5
		EPB41L3
		EPB41L4A
		EPB41L4B
		EPHA3
		EPHA4
		EPHA7
		EPHB4
		EPHX2
		EPHX4
		EPM2A
		ETFDH
		ETHE1
		ETS2
		ETV4
		EVA1A
		EXO1
		EXOSC2
		EXOSC5
		F13A1
		F2RL1
		FAM107A
		FAM107B
		FAM114A1
		FAM124A
		FAM126B
		FAM129A
		FAM13B
		FAM161B
		FAM171B
		FAM189A1
		FAM214A
		FAM46A
		FAM46C
		FAM53A
		FAM83H
		FAM89A
		FAM8A1
		FAM92A
		FANCB
		FAS
		FASN
		FAT4
		FAXC
		FAXDC2
		FBL
		FBLIM1
		FBXL22
		FBXL7
		FBXO32
		FBXO41
		FCMR
		FECH
		FEM1C
		FERMT1
		FERMT2
		FEZ1
		FEZ2
		FGD4
		FGF13
		FGF18
		FGF2
		FGF7
		FGFR1
		FGFR2
		FGFR4
		FGFRL1
		FGL2
		FHL1
		FILIP1
		FJX1
		FKBP10
		FKBP1B
		FKBP5
		FLI1
		FLNA
		FLRT2
		FLVCR1
		FLVCR2
		FNBP1
		FNIP2
		FOSL1
		FOXF1
		FOXF2
		FOXN3
		FOXO1
		FOXP2
		FOXP4
		FOXQ1
		FRAS1
		FRMD4B
		FTSJ1
		FUT1
		FXYD3
		FXYD5
		FZD4
		GAB1
		GABRA2
		GALNT1
		GALNT6
		GARS
		GAS1
		GAS7
		GATD1
		GBP3
		GCNT2
		GCNT4
		GCSAM
		GFI1
		GFRA1
		GHR
		GIMAP6
		GINM1
		GINS1
		GJB4
		GLI3
		GLTP
		GNA11
		GNA13
		GNAI1
		GNAL
		GNAO1
		GNAQ
		GNG2
		GNPDA1
		GOLGA7B
		GOLM1
		GPAT3
		GPC6
		GPD1L
		GPER1
		GPM6B
		GPR157
		GPR183
		GPRASP1
		GPT2
		GPX2
		GPX3
		GRAMD1A
		GRAMD2B
		GRB7
		GREM2
		GRHL1
		GRHL3
		GRINA
		GSKIP
		GYPC
		HACD1
		HAPLN1
		HCFC2
		HDAC9
		HECTD2
		HELZ2
		HENMT1
		HERC3
		HGH1
		HHEX
		HHIP
		HIGD1A
		HILPDA
		HK2
		HLF
		HM13
		HMGA1
		HMGB3
		HMOX1
		HOMER1
		HOXD13
		HPGD
		HPSE
		HSD17B11
		HSD17B6
		HSP90AB1
		HSPA1B
		HSPA2
		HSPB7
		HSPB8
		HSPD1
		HSPH1
		HVCN1
		ID2
		IER5L
		IFIT1
		IFITM3
		IFRD2
		IKZF1
		IL10RA
		IL11
		IL11RA
		IL1A
		IL6R
		IL6ST
		IMMP2L
		IMPA1
		IMPDH1
		INHBA
		INPP5D
		INTS13
		IPO4
		IQANK1
		IQGAP2
		IQGAP3
		IRAK1
		IRAK2
		IRF4
		ISX
		ITGB3
		ITM2C
		ITPKB
		ITPR1
		JADE3
		JAG2
		JAM3
		JAZF1
		JCAD
		JCHAIN
		JPH1
		JPH2
		KANK2
		KAT2A
		KAT2B
		KATNAL1
		KBTBD11
		KCND3
		KCNH8
		KCNJ14
		KCTD1
		KCTD12
		KCTD9
		KIAA0513
		KIAA1211
		KIAA1549
		KIF13B
		KIF18B
		KIF1C
		KIF20A
		KIF21B
		KIF5C
		KIT
		KITLG
		KLF2
		KLF4
		KLF6
		KLF8
		KLF9
		KLHDC8B
		KLHL13
		KLHL17
		KLHL31
		KLHL6
		KRBA1
		KRT80
		L1CAM
		LAGE3
		LAMA1
		LANCL3
		LAPTM4B
		LARGE1
		LARGE2
		LAS1L
		LDOC1
		LEF1
		LEPR
		LGR4
		LHFPL2
		LIF
		LIFR
		LIMA1
		LIMK1
		LIPG
		LIPH
		LITAF
		LIX1L
		LMO3
		LMOD1
		LMTK3
		LOXL2
		LOXL4
		LPP
		LRMP
		LRP11
		LRP8
		LRRC1
		LRRC61
		LRRK2
		LRRN2
		LRRN4CL
		LSM7
		LXN
		LYST
		LZTS3
		MACC1
		MAF
		MAGI2
		MAGI3
		MALL
		MAN1A1
		MAN1C1
		MAOA
		MAOB
		MAP1A
		MAP1B
		MAP6
		MAP9
		MAPK6
		MARCKS
		MASP1
		MATN2
		MBNL1
		MBNL3
		MCM10
		MCM2
		MCM7
		MCOLN2
		MDFI
		MDFIC
		MEF2C
		MEIS1
		MEIS2
		MELK
		MEST
		MET
		METTL26
		METTL7A
		MEX3A
		MFAP4
		MFAP5
		MFN2
		MFSD12
		MFSD4A
		MGAT4A
		MIER1
		MIER3
		MIPOL1
		MITF
		MLXIPL
		MMP11
		MMRN1
		MOB3B
		MOCS3
		MPC1
		MPDZ
		MPEG1
		MPP2
		MPP7
		MPPE1
		MPZ
		MRGBP
		MROH6
		MRPL17
		MRVI1
		MS4A6A
		MSRB3
		MSX1
		MT1E
		MT1F
		MT1G
		MT1H
		MT1M
		MT1X
		MT2A
		MTERF3
		MTG2
		MTHFD1L
		MTM1
		MTMR10
		MTMR9
		MTUS1
		MXD1
		MXI1
		MYBL2
		MYH11
		MYL6
		MYL9
		MYLK
		MYO1C
		MYO5A
		MYOCD
		MZB1
		NAAA
		NACC2
		NANP
		NAP1L5
		NAT10
		NAT9
		NBEA
		NBEAL1
		NBEAL2
		NCAM1
		NCAPG2
		NCOA4
		NDRG4
		NEBL
		NECTIN3
		NECTIN4
		NEDD4L
		NEGR1
		NELFCD
		NEO1
		NEU4
		NEURL1
		NEURL1B
		NEXN
		NFASC
		NFATC1
		NGFR
		NIFK
		NIPAL1
		NKD1
		NKRF
		NLE1
		NMB
		NME1
		NOB1
		NOD2
		NOL6
		NOP16
		NOP2
		NOP56
		NOTCH3
		NPEPL1
		NPR1
		NPRL3
		NPTN
		NPTXR
		NR2C2AP
		NR3C1
		NR3C2
		NR5A2
		NR6A1
		NRG1
		NRIP1
		NSMF
		NTN1
		NTN4
		NUDCD1
		NUFIP1
		NUP62CL
		NXPE3
		NXT1
		OGFR
		OGT
		OLFM1
		ONECUT2
		ORC6
		OSBPL1A
		OSBPL3
		OTUB2
		OTX1
		OXCT1
		OXTR
		P2RX4
		P2RY2
		P3H1
		P3H2
		PABPC1
		PABPC1L
		PABPC3
		PAFAH1B3
		PAFAH2
		PAG1
		PAICS
		PALD1
		PALLD
		PALMD
		PANK3
		PAPSS2
		PAQR4
		PAQR5
		PAQR8
		PARD6G
		PARM1
		PBLD
		PBX1
		PBX3
		PBX4
		PC
		PCDH19
		PCDH7
		PCDHGB7
		PCED1A
		PCK1
		PCMTD2
		PCP4
		PCSK5
		PCSK6
		PCSK7
		PCSK9
		PDCD4
		PDE1A
		PDE1C
		PDE2A
		PDE3A
		PDE4D
		PDE5A
		PDE7B
		PDGFD
		PDGFRA
		PDK4
		PDLIM2
		PDRG1
		PEG10
		PER1
		PER3
		PERP
		PEX26
		PGGHG
		PGM1
		PGM5
		PHLDA1
		PHLDB2
		PHLPP2
		PI15
		PID1
		PIGZ
		PILRB
		PIP5K1B
		PITPNM3
		PJA2
		PKIA
		PKIB
		PKMYT1
		PKP1
		PLA2G4A
		PLAGL2
		PLAU
		PLCD1
		PLCD3
		PLCG1
		PLCL1
		PLEKHG4
		PLEKHO1
		PLOD3
		PLPP1
		PLPP3
		PLS1
		PLSCR4
		PLXNA1
		PLXNA3
		PMAIP1
		PMEPA1
		PMP22
		PNO1
		POLD2
		POLM
		POLR1B
		POLR1D
		POP1
		PORCN
		POU2AF1
		POU2F2
		POU5F1B
		PPARGC1A
		PPARGC1B
		PPAT
		PPM1H
		PPM1L
		PPP1R12B
		PPP1R13L
		PPP1R16B
		PPP1R3C
		PPP2CB
		PPP2R3A
		PPRC1
		PQLC1
		PRDM6
		PRDM8
		PRDX6
		PREX2
		PRICKLE2
		PRKAA2
		PRKACB
		PRKAR2B
		PRKCB
		PRKG1
		PRNP
		PROM2
		PRSS22
		PRUNE2
		PRX
		PSAT1
		PSD3
		PSMA7
		PSPH
		PTBP2
		PTGDR2
		PTGER3
		PTGER4
		PTGFR
		PTGIS
		PTGS1
		PTK2B
		PTK7
		PTP4A1
		PTPN21
		PUS7
		PXMP2
		PYCR3
		PYGO1
		QSOX2
		RAB15
		RAB27A
		RAB27B
		RAB36
		RAB3B
		RAB6B
		RAD54B
		RAE1
		RAP1A
		RARRES3
		RASD2
		RASSF2
		RASSF3
		RASSF8
		RBL1
		RBM47
		RBPMS2
		RCAN1
		RCL1
		RCN1
		RCSD1
		RECK
		RECQL4
		REEP1
		REEP2
		REEP3
		RERG
		RET
		RETREG1
		RFC3
		RGL1
		RGMA
		RGS16
		RGS2
		RGS5
		RHBDF2
		RHEBL1
		RHOF
		RHOH
		RHOJ
		RHOU
		RHPN1
		RIMKLA
		RIMKLB
		RIMS3
		RIOK3
		RIPK2
		RIPOR2
		RMDN2
		RNASEL
		RNF11
		RNF125
		RNF138
		RNF144A
		RNF150
		RNF152
		RNF32
		RNF43
		RNFT2
		ROR1
		ROR2
		RPGRIP1L
		RPIA
		RPL28
		RPP25
		RPS6KA5
		RPS6KL1
		RPUSD1
		RRP12
		RSPO3
		RTKN
		RTL10
		RUNDC3B
		RUNX1
		RUNX1T1
		S100A11
		S100P
		S1PR1
		SALL2
		SALL4
		SAMD10
		SAMD4A
		SAMD9
		SAPCD2
		SASH3
		SCARA3
		SCARA5
		SCARB1
		SCD
		SCG2
		SCIMP
		SCLY
		SCML1
		SCN9A
		SCP2
		SCUBE2
		SDCCAG3
		SEC14L2
		SECISBP2L
		SELENBP1
		SEMA4G
		SEMA6A
		SEMA6D
		SERINC1
		SERPINE1
		SERPINH1
		SERTAD4
		SETBP1
		SFMBT2
		SFRP1
		SFXN3
		SGCB
		SGK1
		SGMS2
		SGPP1
		SH2D2A
		SH3BGR
		SH3BGRL
		SH3TC2
		SHE
		SHH
		SHMT2
		SIAE
		SIDT1
		SIGMAR1
		SIM2
		SIPA1L2
		SKA3
		SLAMF1
		SLAMF7
		SLC12A2
		SLC12A8
		SLC16A7
		SLC16A9
		SLC17A4
		SLC17A5
		SLC19A1
		SLC19A2
		SLC1A1
		SLC1A5
		SLC22A23
		SLC22A3
		SLC22A5
		SLC25A20
		SLC25A22
		SLC25A23
		SLC25A4
		SLC26A2
		SLC29A4
		SLC2A13
		SLC2A4
		SLC30A4
		SLC35A1
		SLC35A3
		SLC35C2
		SLC35D1
		SLC35G1
		SLC36A1
		SLC37A2
		SLC39A10
		SLC41A2
		SLC46A3
		SLC4A4
		SLC52A2
		SLC5A6
		SLC6A6
		SLC7A1
		SLC7A11
		SLC7A2
		SLC7A5
		SLC7A6
		SLC8A1
		SLC9A1
		SLC9A2
		SLCO1B3
		SLCO2A1
		SLIT2
		SLMAP
		SMARCA1
		SMCHD1
		SMIM14
		SMIM5
		SMOX
		SMPD1
		SMPDL3B
		SMYD5
		SNAI1
		SNCG
		SNRPB
		SNTB1
		SNX24
		SOBP
		SOCS2
		SOCS6
		SORBS1
		SORBS2
		SORD
		SOX4
		SOX9
		SP6
		SPART
		SPATA33
		SPDEF
		SPECC1
		SPEG
		SPNS3
		SPOCD1
		SPPL2A
		SPRY4
		SPTBN2
		SPTLC3
		SRCIN1
		SRI
		SRM
		SRPX
		SS18L1
		SSBP2
		SSFA2
		SSTR1
		ST6GALNAC3
		ST6GALNAC6
		STARD9
		STBD1
		STC1
		STC2
		STEAP4
		STIM1
		STK17B
		STOM
		STON1
		STRIP2
		STS
		STX12
		STX16
		STX1A
		STYK1
		SUCLG2
		SVEP1
		SVIL
		SYNE1
		SYNE3
		SYNGR1
		SYNJ2BP
		SYNM
		SYNPO
		SYNPO2
		SYT11
		SYT7
		SYTL2
		TAGAP
		TAGLN
		TARBP1
		TAZ
		TBC1D1
		TBC1D16
		TBC1D9
		TCEAL7
		TCF21
		TCF7
		TCF7L1
		TCFL5
		TCN2
		TCP11L2
		TDP2
		TEF
		TESC
		TESMIN
		TFAP4
		TFCP2L1
		TFPI
		TFR2
		TGDS
		TGFB1I1
		TGFBI
		TGFBR3
		TGIF1
		TGIF2
		THEM6
		THRB
		THSD7A
		TIAM1
		TICRR
		TKT
		TLCD1
		TLE4
		TLR1
		TMCC3
		TMEM200B
		TMEM206
		TMEM25
		TMEM30B
		TMEM41A
		TMEM45B
		TMEM47
		TMEM56
		TMEM63A
		TMEM74B
		TMEM9
		TMEM97
		TMOD2
		TMPRSS2
		TMPRSS3
		TMTC1
		TMTC4
		TNFRSF11A
		TNFRSF12A
		TNFSF10
		TNFSF12
		TNS1
		TOM1L2
		TOMM34
		TOX
		TOX2
		TP53INP1
		TP53INP2
		TP53RK
		TPD52L2
		TPM1
		TPM2
		TPX2
		TRAF5
		TRAK2
		TRANK1
		TRHDE
		TRIB3
		TRIM29
		TRIM36
		TRIP13
		TROAP
		TRPC1
		TSEN2
		TSHZ1
		TSHZ3
		TSPAN1
		TSPAN18
		TSPAN7
		TSPYL5
		TSSK6
		TTC26
		TTC28
		TTLL4
		TTLL7
		TTYH3
		TUB
		TUBA1A
		TUSC3
		TWNK
		TXNIP
		UBE2C
		UBE3D
		UGDH
		UGP2
		UGT1A10
		UGT2B17
		UHRF1
		USP2
		UST
		VAMP2
		VAPA
		VCL
		VDR
		VEGFA
		VGLL3
		VLDLR
		VPS13D
		VPS4B
		VSIG4
		VSIR
		VSNL1
		VWA5A
		WASL
		WDFY4
		WDR4
		WDR7
		WDR74
		WDR75
		WDR77
		WNT2B
		WNT9A
		WSCD1
		WWTR1
		XPNPEP3
		XPO5
		XPOT
		XRCC2
		YTHDF1
		ZBTB47
		ZBTB7B
		ZBTB7C
		ZC3H12C
		ZC3HAV1L
		ZDBF2
		ZDHHC9
		ZEB1
		ZEB2
		ZFPM2
		ZFYVE28
		ZMIZ2
		ZMYND19
		ZNF154
		ZNF182
		ZNF233
		ZNF239
		ZNF280C
		ZNF304
		ZNF354C
		ZNF43
		ZNF514
		ZNF518B
		ZNF568
		ZNF671
		ZNF692
		ZNF696
		ZNF697
		ZNF703
		ZNF74
		ZNF772
		ZNF783
		ZSCAN18
		ZSWIM4
		ZSWIM6
		ZYG11B
		ZZEF1
DE, differentially expressed; lncRNA, long non-coding RNA; miRNA/miR, microRNA.
